# Supplementary material for: Development and Evaluation of Vero Cell-Derived Master Donor Viruses for Influenza Pandemic Preparedness
Source: PubMed Central journal article supplement (PMC7712210; doi:10.3390/vaccines8040626), 2020-10-25

**Table S1. Primers used in this study**

|                |                                                |                                         |
|----------------|------------------------------------------------|-----------------------------------------|
| Bm-HA-F        | TATTCGTCTCAGGGAGCAAAGCAGGGG                    | Hoffmann E et al.,<br>2001, Arch Virol  |
| Bm-NS-R        | ATATCGTCTCGTATTAGTAGAAACAAGGGT<br>GTTTT        | Hoffmann E et al.,<br>2001, Arch Virol  |
| Bm-NA-F        | TATTCGTCTCAGGGAGCAAAGCAGGAG<br>T               | Hoffmann E et al.,<br>2001, Arch Virol  |
| Bm-NA-R        | ATATCGTCTCGTATTAGTAGAAACAAGGAG<br>TTTTTT       | Hoffmann E et al.,<br>2001, Arch Virol  |
| Bm-NS-F        | TATTCGTCTCAGGGAGCAAAGCAGGGT<br>G               | Hoffmann E et al.,<br>2001, Arch Virol  |
| Bm-NS-R        | ATATCGTCTCGTATTAGTAGAAACAAGGGT<br>GTTTT        | Hoffmann E et al.,<br>2001, Arch Virol  |
| Bm-N9uni-F     | TATTCGTCTCAGGGAGCAAAGCAGGGTC                   | Li J et al., 2014,<br>Emerg Infect Dis. |
| Bm-N9uni-R     | ATATCGTCTCGTATTAGTAGAAACAAGGGT<br>CTTTTT       | Li J et al., 2014,<br>Emerg Infect Dis. |
| Ba-H5-F2       | TATTGGTCTCAGGGAGCAAAGCAGGGG<br>TTCACCTCTGTCAAA | This study                              |
| Ba-H5-R        | ATATGGTCTCGTATTAGTAGAAACAAGGGT<br>GTTTTTAACTAC | This study                              |
| H7-820F        | GGGAATCCAGAGTGGAGTACAGGTT                      | This study                              |
| H7-1110R       | TCCCTGTGCATTCTGGTGTCTG                         | This study                              |
| N9-500F        | TGGAATGCATTGGGTGGTCAAGTA                       | This study                              |
| N9-650R        | GATTCCTGTGTTCTTAGTATGTTTC                      | This study                              |
| H5-620 F       | GATGAGGCAGAGCAGACAAGG                          | This study                              |
| H5-1100R       | ATCCCTGCCATCCTCCCTCTAT                         | This study                              |
| N1-650F        | GGCTCTTGCTTTACTGTAATGACTGATG                   | This study                              |
| N1-900R        | ATCATTGGGGCGTGGATTGTCT                         | This study                              |
| H5 (H5N2)-670F | CAGAGGTCAATCCCAGAAATAGC                        | This study                              |
| H5 (H5N2)-900R | CATTGTGAAAGGCATACTGGAA                         | This study                              |
| N2 (H5N2)-600F | GATGCTCGTTGACAGTATAGGTTTC                      | This study                              |
| N2 (H5N2)-800R | GTCTCTGCATACACATCTGACATT                       | This study                              |
| PB2-1F         | AGCGAAAGCAGGTCAATTATATT                        | This study                              |
| PB2-1R         | GGCACATCTCCAATAAAGATGC                         | This study                              |

|            |                                                 |            |
|------------|-------------------------------------------------|------------|
| PB2-2F     | ACATAGTGAGAAGAGCTGCAGTATC                       | This study |
| PB2-2R     | CCAGTTTCTGATGATCCATTGA                          | This study |
| PB2-3F     | GATTAATGGTCCTGAATCAGTGTT                        | This study |
| PB2-3R     | AGTAGAAACAAGGTCTTTTTAAACT                       | This study |
| PB1-1F     | AGCGAAAGCAGGCAAACC                              | This study |
| PB1-1R     | GCCAACTTTGCTTTCTTCTCAT                          | This study |
| PB1-2F     | TTGAACAATCAGGGTTGCC                             | This study |
| PB1-2R     | ATGAACAACCTGAAGGGCCA                            | This study |
| PB1-3F     | AATATGATAACAATGATCTTGGTCC                       | This study |
| PB1-3R     | AGTAGGAACAAGGCATTTTTTCA                         | This study |
| PA-1F      | AGCGAAAGCAGGTAATGATCC                           | This study |
| PA-1R      | GCTTGCCCTCAATGTAGCC                             | This study |
| PA-2F      | TAGAGCCTATGTGGATGGATTC                          | This study |
| PA-2R      | CCCTCCTTAGTTCTACACTTGCT                         | This study |
| PA-3F      | TGCCTTACTTAATGCATCTTGTG                         | This study |
| PA-3R      | AGTAGAAACAAGGTACTTTTTTGGAC                      | This study |
| NP-1F      | AGCAAAAGCAGGGTAGATAATCA                         | This study |
| NP-1R      | TGCAGACCGTGCTAGAAAAGT                           | This study |
| NP-2F      | CAAGTGAGAGAGAGCCGGG                             | This study |
| NP-2R      | AGTAGAAACAAGGGTATTTTTCTTTAAT                    | This study |
| NS-1F      | AGCAAAAGCAGGGTGACAA                             | This study |
| NS-1R      | AGTAGAAACAAGGGTGTTTTTTATTAT                     | This study |
| M1-1F      | AGCGAAAGCAGGTAGATATTGA                          | This study |
| M1-2R      | AGTAGAAACAAGGTAGTTTTTTACTCC                     | This study |
| PB2-504V-F | GACCGTTTTTTGAGAGTCCGGGACCAAC<br>GAG             | This study |
| PB2-504V-R | CTCGTTGGTCCCGGACTCTCAAAAAACGG<br>TC             | This study |
| PB1-40L-F  | GGAACAGGATACACCTTGGATACTGTCAA<br>CAGG           | This study |
| PB1-40L-R  | CCTGTTGACAGTATCCAAGGTGTATCCTGT<br>TCC           | This study |
| PB1-180W-F | CAATGAACAAAGAAGAAATGTGGATCAC<br>AACTCATTTTCAGAG | This study |
| PB1-180W-R | CTCTGAAAATGAGTTGTGATCCACATTTCT                  | This study |

|              |                                              |                                                  |
|--------------|----------------------------------------------|--------------------------------------------------|
|              | TCTTTGTTTCATTG                               |                                                  |
| PA-401K-F    | GTGATGAACCAGAATTGAAGTCGCTTGCA<br>AGTTGG      | This study                                       |
| PA-401K-R    | CCAACCTTGCAAGCGACTTCAATTCTGGTT<br>CATCAC     | This study                                       |
| NS-30P-F     | CAAGAACTAGGCGATCCCCATTCTTGAT<br>CG           | This study                                       |
| NS-30P-R     | CGATCAAGGAATGGGGGATCGCCTAGTTC<br>TTG         | This study                                       |
| NS-118K-F    | GGCCCTCTTTGTATCAAATGGACCAGGC<br>GATC         | This study                                       |
| NS-118K-R    | GATCGCCTGGTCCATTTTGATACAAAGAG<br>GGCC        | This study                                       |
| NP-116L-F2   | CATCCTTTATGACAAAGAAGAAATTAAGGC<br>GAATCTGGCG | This study                                       |
| NP-116L-R2   | GCCAGATTCGCCTTAATTCTTCTTTGTCAT<br>AAAGGATGAG | This study                                       |
| M146F        | GACCRATCCTGTACCTCTGAC                        | Zhu H et al., 2010,<br>Virology                  |
| M251R        | AGGGCATTYTGGACAAKCGTCTA                      | Zhu H et al., 2010,<br>Virology                  |
| qNP-514F     | CCCAGGATGTGCTCTCTGAT                         | Khaperskyy DA et al.,<br>2016, PLOS<br>Pathogens |
| qNP-673R     | TTCGTCCATTCTCACCCCTC                         | Khaperskyy DA et al.,<br>2016, PLOS<br>Pathogens |
| Beta-actin-F | TGGATCAGCAAGCAGGAGTATG                       | Zhu H et al., 2010,<br>Virology                  |
| beta-actin-R | GCATTTGCGGTGGACGAT                           | Zhu H et al., 2010,<br>Virology                  |

**Table S2. Genetic differences of six internal genes between PR8 from NIBSC, US CDC, St. Jude Children Hospital, and PR8-HY**

| Gene | Protein   | Position | PR8 NIBSC | PR8 USCDC | PR8 St. Jude (PR8-UW) | PR8-HY* |
|------|-----------|----------|-----------|-----------|-----------------------|---------|
| PB2  | PB2       | 105      | M         | M         | I                     | I       |
|      |           | 251      | K         | K         | R                     | R       |
|      |           | 299      | K         | K         | R                     | R       |
|      |           | 360      | S         | S         | Y                     | Y       |
|      |           | 504      | V         | V         | I                     | V       |
|      |           | 702      | R         | R         | K                     | K       |
| PB1  | PB1       | 40       | M         | M         | M                     | L       |
|      |           | 175      | K         | K         | N                     | N       |
|      |           | 180      | G         | G         | G                     | W       |
|      |           | 205      | I         | I         | M                     | M       |
|      |           | 208      | R         | R         | K                     | K       |
|      |           | 216      | G         | G         | S                     | S       |
|      |           | 563      | R         | R         | I                     | I       |
|      | PB1-F2    | 59       | K         | K         | R                     | R       |
|      |           | 60       | Q         | Q         | R                     | R       |
|      | PA        | PA       | 158       | R         | R                     | K       |
| 401  |           |          | R         | R         | R                     | K       |
| 550  |           |          | L         | L         | I                     | I       |
| NP   | NP        | 116      | I         | I         | I                     | L       |
|      |           | 353      | V         | V         | L                     | L       |
|      |           | 425      | V         | V         | I                     | I       |
|      |           | 430      | T         | T         | N                     | N       |
| M    | M2        | 27       | A         | A         | T                     | T       |
|      |           | 39       | I         | I         | T                     | T       |
| NS   | NS1       | 30       | A         | A         | A                     | P       |
|      |           | 55       | E         | E         | K                     | K       |
|      |           | 101      | E         | E         | D                     | D       |
|      |           | 118      | R         | R         | R                     | K       |
|      | NS2 (NEP) | 89       | V         | V         | I                     | I       |

\*: Ping J, 2015, Nature communication

**Table S3. A list of mutations among master donor viruses compared in this study.**

| Protein | Master donor viruses |                                |               |             |
|---------|----------------------|--------------------------------|---------------|-------------|
|         | PR8-NIBSC            | vB5                            | Vero-15 (V15) | PR8-HY (HY) |
| PB2     | -                    | S360Y                          | S360Y         | M105I       |
|         |                      |                                |               | K251R       |
|         |                      |                                |               | K299R       |
|         |                      |                                |               | S360Y       |
|         |                      |                                |               | R702K       |
|         |                      |                                |               | M40L        |
|         |                      |                                |               | K175N       |
| PB1     | -                    | -                              | K197L         | G180W       |
|         |                      |                                |               | I205M       |
|         |                      |                                |               | R208K       |
|         |                      |                                |               | G216S       |
| PB1-F2  | -                    | -                              | -             | R563I       |
|         |                      |                                |               | K59R        |
|         |                      |                                |               | Q60R        |
| PA      | -                    | -                              | E493G         | R158K       |
|         |                      |                                |               | R401K       |
|         |                      |                                |               | L550I       |
| NP      | -                    | -                              | -             | I116L       |
|         |                      |                                |               | V353L       |
|         |                      |                                |               | V425I       |
| M1      | -                    | -                              | -             | T430N       |
|         |                      |                                |               | -           |
| M2      | -                    | -                              | -             | A27T        |
|         |                      |                                |               | I39T        |
| NS1     | -                    | Truncated<br>NS1<br>(129 a.a.) | L95P<br>L115P | A30P        |
|         |                      |                                |               | E55K        |
|         |                      |                                |               | E101D       |
| NEP     | -                    | -                              | -             | R118K       |
|         |                      |                                |               | V89I        |

**Table S4. HA antigen yield of influenza H5N1 and H7N9 reassortant vaccine viruses**

**generated using MDV vB5.**

|                       | rRG6-vB5 | rRG268-vB5 | rRG56B-vB5 |
|-----------------------|----------|------------|------------|
| Total protein (µg/ml) | 120.52   | 452.47     | 573.74     |
| HA conc. (µg/ml)      | 46.16    | 76.89      | 206.43     |
| Total protein/HA      | 2.61     | 5.88       | 2.78       |

**Figure S1. HA content** of purified rRG56B-vB5 was analysed by densitometry.

8 µg of purified rRG56B-vB5 viruses were treated with PNGase F at 37°C for overnight. Each band was separated in 12% SDS-PAGE with 1X TG-SDS running buffer.

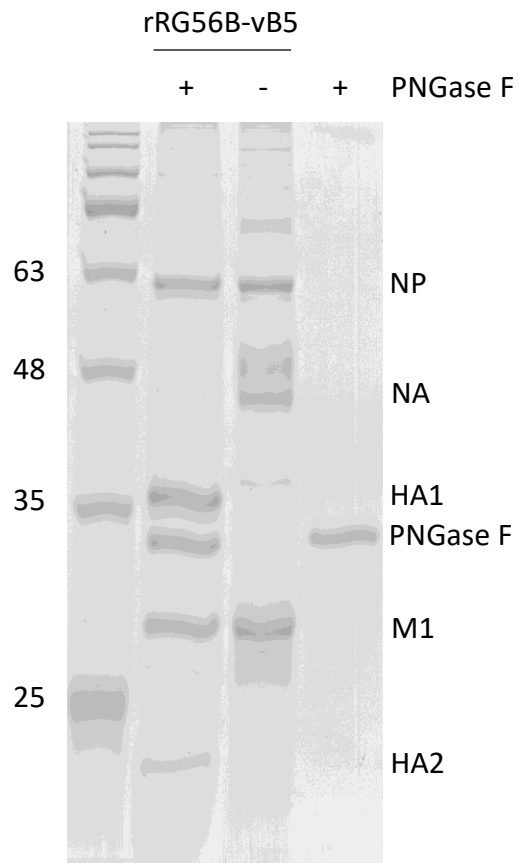

The percentage of HA: 35.98%

**Figure S2. Growth property of reassortant viruses in M199 medium in 6-well plates.**

Vero cells were cultivated in 6-well plates with serum-containing M199. The medium was replaced to serum-free M199 medium before infection. The MOI for the infection is 0.001. TPCK-trypsin was supplied, and the culture medium were sampled every day for TCID and HA assay. (a) The virus titre. (b) The HA titre. (c) The peak titre.

a

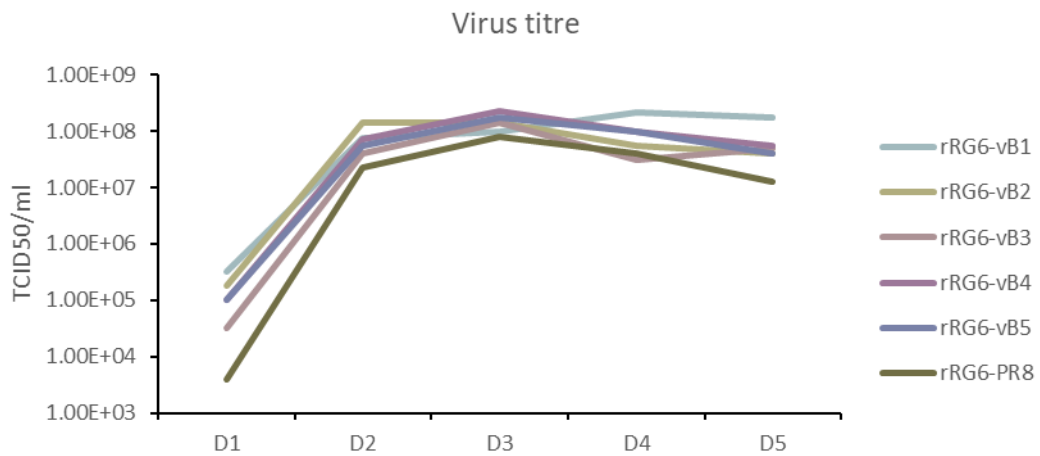

b

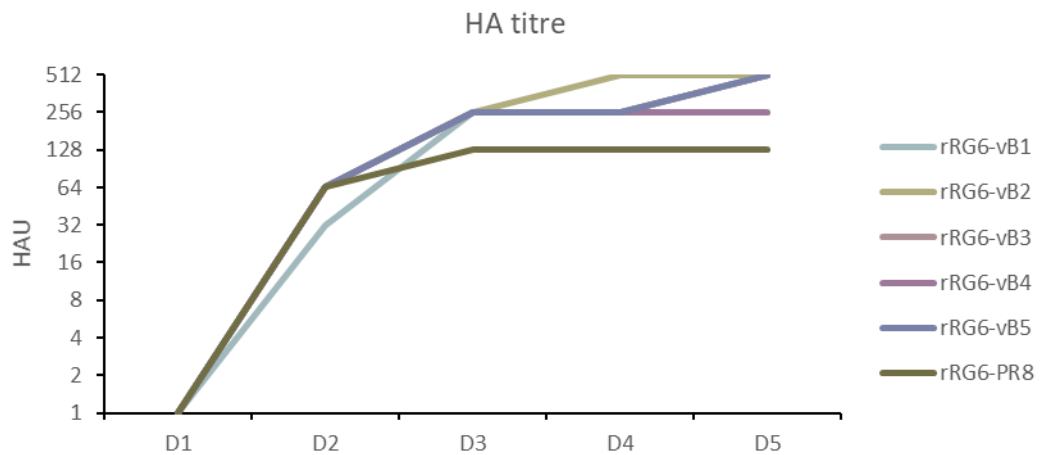



c

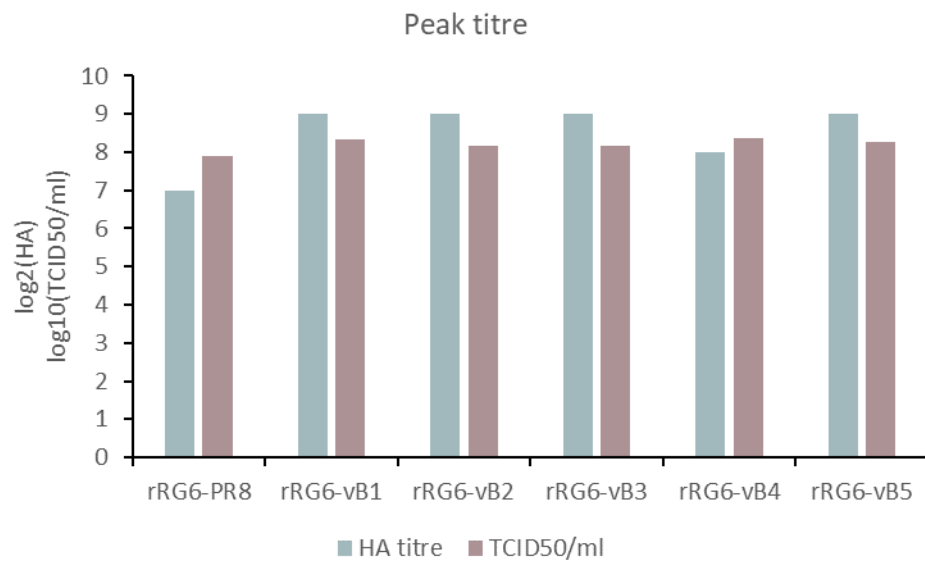

**Figure S3. Virus growth of rRG6-vB5 in MDCK cells.** MDCK cells were cultivated on Cytodex 1 microcarriers with OPTI-PRO SFM. Before infection, the culture medium was replaced to fresh one. The infection MOI was 0.0001. The samples collected every day were analysed for TCID and HA. (A) The HA titre (B) The virus titre (C) The peak HA titre.

A.

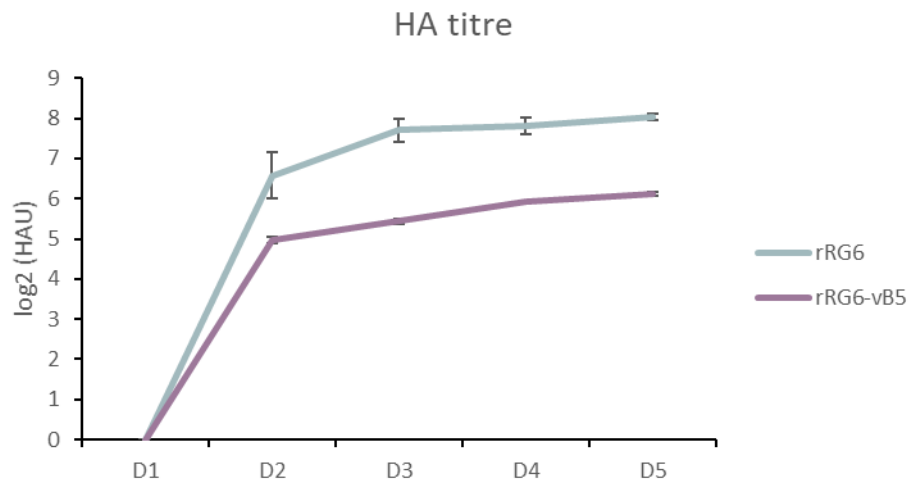

B.

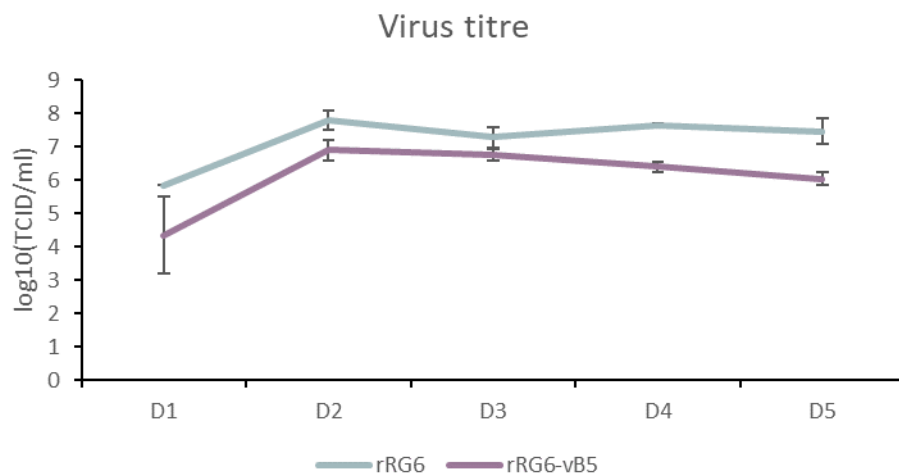

C.

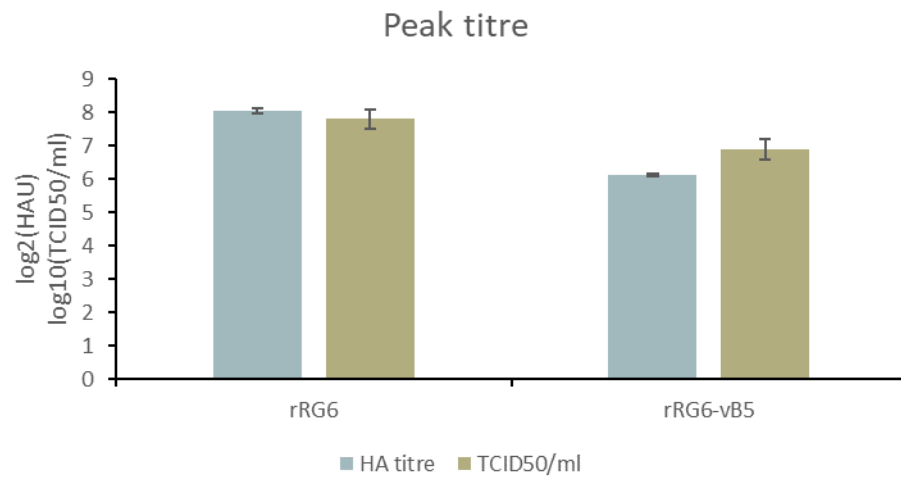

Supplement: vaccines-08-00626-s001.pdf [file vaccines-08-00626-s001.pdf]
